# Supplementary material
Source: publisher site journal article supplement (https://www.dovepress.com/article/561395)
Supplement: Supplementary file 1 [file 561395%20Table%20S1.docx]

Table S1: Main Mechanisms of Action of MA in COPD

| Category of Mechanism of Action | Key Findings (Model/Cell) | Involved Signaling Pathways/Molecules | References |
| --- | --- | --- | --- |
| Anti-inflammatory and Antioxidant | Alleviates emphysema in smoke-exposed rats; reduces neutrophils, lymphocytes, IL-8, and LTB4; inhibits MMP-2, MMP-9, MMP-9/TIMP-1, β-catenin, TNF-α, IL-1β, and IL-6; decreases ROS; mitigates CSE-induced oxidative stress in macrophages; suppresses NETs-related inflammation | MAPK/NF-κB, Keap1/Nrf2/GSH, Nrf2/HDAC2, PPARγ/NF-κB, PI3K/AKT/mTOR/PTEN, ROS/SIRT1/SIRT3 | 16, 17, 18, 19, 20, 21, 22 |
| Immunomodulation | Reduces CXCL1, TNF-α, IL-13, and IL-12; inhibits Th17 cell differentiation and IL-17A/IL-17F; decreases RORγt mRNA expression; suppresses NETs formation and NE/MPO; alleviates emphysema; reduces Th1/Th17 cell responses and mDCs activation; decreases MDC and IP-10; upregulates Treg | Glycolic acid, Indole-3-acetic acid, CD8+ T cell granzyme B, CD40/CD40L, NADPH/ROS, IKK/p65/JNK/ERK phosphorylation | 25, 26, 27, 28, 29, 30 |
| Attenuation of Steroid Resistance | Reduces 8-iso-PGF2α, IL-8, and TNF-α; restores glucocorticoid sensitivity; inhibits IL-4/8/TSLP and IL-5/17A | PI3K/AKT/HDAC2, PI3K/AKT/HDAC2/GR, PI3Kδ/Akt/HDAC2, JNK/c-Jun | 31, 32, 33, 34, 35 |
| Anti-cellular Senescence | Decreases MDA and ROS; increases SOD activity; downregulates senescence markers P53 and P21; reduces the number of SA-β-gal-positive cells | PI3K/mTOR | 36 |
| Enhancement of Epithelial Barrier Integrity | Increases TEER; reduces paracellular permeability | Tight junction proteins, Desmosomal proteins, CAV-1, EMT | 37, 21 |
| Others | Reduces mitochondrial swelling; restores cristae structure; decreases lysosomal aggregation; inhibits secondary lysosome formation; alleviates endoplasmic reticulum expansion; reduces electron-dense granules; improves lung function | Epithelial sodium channel (ENaC) | 38, 39 |
